# Supplementary material for: Feasibility and Outcomes of the Early Start Denver Model Delivered within the Public Health System of the Friuli Venezia Giulia Italian Region
Source: MDPI journal article supplement (doi:10.3390/brainsci11091191), 2021-09-10
Supplement: s1 [file s1]

**Table S1.** Summary of results for ESDM and TAU groups

|                                                 | T0-T1          |               | T1-T2          |               | Time              |          | Group         |          | Time x Group  |          |  |
|-------------------------------------------------|----------------|---------------|----------------|---------------|-------------------|----------|---------------|----------|---------------|----------|--|
|                                                 | Mean Δ         | Mean Δ        | Mean Δ         | Mean Δ        | <i>p</i>          | $\eta^2$ | <i>p</i>      | $\eta^2$ | <i>p</i>      | $\eta^2$ |  |
|                                                 | ESDM<br>(N=19) | TAU<br>(N=19) | ESDM<br>(N=19) | TAU<br>(N=19) |                   |          |               |          |               |          |  |
| <b>Development Profile</b>                      |                |               |                |               |                   |          |               |          |               |          |  |
| Cognitive                                       | 6.68           | 2.63          | 2.95           | -1.37         | <b>0.013*</b>     | 0.11     | 0.957         | 0.01     | 0.106         | 0.06     |  |
| Language                                        | 6.79           | 4.37          | 3.74           | 5.37          | <b>&lt;0.001*</b> | 0.34     | 0.442         | 0.02     | 0.769         | 0.01     |  |
| <b>ADOS-2</b>                                   |                |               |                |               |                   |          |               |          |               |          |  |
| CSS SA                                          | -2.16          | -1.00         | -1.16          | -1.16         | <b>&lt;0.001*</b> | 0.46     | <b>0.048*</b> | 0.10     | 0.173         | 0.05     |  |
| CSS RRB                                         | 0.53           | 0.89          | 0.21           | -0.58         | 0.091             | 0.06     | <b>0.034*</b> | 0.12     | 0.494         | 0.02     |  |
| CSS Total                                       | -1.37          | -0.74         | -0.95          | -1.00         | <b>&lt;0.001*</b> | 0.35     | 0.378         | 0.02     | 0.560         | 0.02     |  |
| <b>VABS-II</b>                                  |                |               |                |               |                   |          |               |          |               |          |  |
| Communication                                   | 3.46           | 1.53          | 4.00           | 2.84          | <b>0.019*</b>     | 0.11     | 0.221         | 0.04     | 0.767         | 0.01     |  |
| Daily living skills                             | -1.07          | -2.79         | -4.26          | -3.16         | 0.058             | 0.08     | <b>0.011*</b> | 0.18     | 0.933         | 0.01     |  |
| Socialization                                   | 2.07           | 0.37          | -4.16          | -1.11         | 0.385             | 0.03     | 0.252         | 0.04     | 0.696         | 0.01     |  |
| Compound scale                                  | 3.19           | -6.32         | -8.00          | -5.89         | <b>0.025*</b>     | 0.10     | 0.087         | 0.08     | 0.296         | 0.03     |  |
| <b>ESDM Curriculum Check List</b>               |                |               |                |               |                   |          |               |          |               |          |  |
| Receptive Communication                         | 21.37          | 13.07         | 12.95          | 12.49         | <b>&lt;0.001*</b> | 0.67     | 0.113         | 0.07     | <b>0.031*</b> | 0.10     |  |
| Expressive Communication                        | 18.53          | 10.57         | 16.32          | 11.40         | <b>&lt;0.001*</b> | 0.59     | 0.093         | 0.08     | <b>0.006*</b> | 0.14     |  |
| Joint Attention                                 | 5.68           | 4.53          | 2.74           | 3.53          | <b>&lt;0.001*</b> | 0.55     | 0.646         | 0.01     | 0.484         | 0.02     |  |
| Social skills                                   | 19.37          | 10.51         | 11.63          | 11.70         | <b>&lt;0.001*</b> | 0.51     | 0.113         | 0.07     | <b>0.049*</b> | 0.09     |  |
| Imitation skills                                | 6.26           | 3.50          | 5.84           | 4.43          | <b>&lt;0.001*</b> | 0.50     | <b>0.009*</b> | 0.19     | <b>0.039*</b> | 0.09     |  |
| Cognitive                                       | 6.89           | 5.46          | 7.47           | 6.73          | <b>&lt;0.001*</b> | 0.53     | 0.157         | 0.06     | 0.278         | 0.04     |  |
| Play                                            | 12.32          | 6.02          | 6.79           | 9.49          | <b>&lt;0.001*</b> | 0.61     | 0.108         | 0.08     | 0.110         | 0.06     |  |
| Fine Motor skills                               | 16.95          | 13.61         | 7.53           | 10.27         | <b>&lt;0.001*</b> | 0.61     | 0.432         | 0.02     | 0.598         | 0.01     |  |
| Gross Motor skills                              | 7.16           | 5.02          | 5.05           | 3.96          | <b>&lt;0.001*</b> | 0.48     | 0.962         | 0.01     | 0.130         | 0.06     |  |
| Adaptive behavior skills                        | 2.32           | 0.90          | 0.47           | 0.96          | <b>0&lt;.001*</b> | 0.24     | <b>0.031*</b> | 0.13     | 0.439         | 0.02     |  |
| Autonomy                                        | 15.74          | 14.63         | 13.05          | 21.76         | <b>&lt;0.001*</b> | 0.41     | 0.264         | 0.04     | 0.920         | 0.01     |  |
| Level                                           | 132.58         | 89.59         | 89.84          | 96.72         | <b>&lt;0.001*</b> | 0.64     | 0.288         | 0.03     | 0.141         | 0.06     |  |
| Overall communication                           | 39.89          | 23.64         | 29.26          | 23.89         | <b>&lt;0.001*</b> | 0.66     | 0.094         | 0.08     | <b>0.008*</b> | 0.14     |  |
| Overall social                                  | 31.32          | 18.54         | 20.21          | 18.55         | <b>&lt;0.001*</b> | 0.57     | 0.077         | 0.09     | <b>0.035*</b> | 0.10     |  |
| Overall cognitive-play                          | 19.21          | 10.59         | 13.74          | 16.22         | <b>&lt;0.001*</b> | 0.60     | 0.117         | 0.07     | 0.177         | 0.05     |  |
| Overall motor                                   | 23.68          | 18.63         | 13.26          | 14.23         | <b>&lt;0.001*</b> | 0.62     | 0.611         | 0.01     | 0.361         | 0.03     |  |
| Communication, social, cognitive-play and motor | 110.58         | 57.35         | 74.58          | 72.89         | <b>&lt;0.001*</b> | 0.62     | 0.180         | 0.05     | <b>0.015*</b> | 0.12     |  |
| <b>BOSCC</b>                                    |                |               |                |               |                   |          |               |          |               |          |  |

|                                      |       |       |       |       |                   |      |       |      |       |      |
|--------------------------------------|-------|-------|-------|-------|-------------------|------|-------|------|-------|------|
| Social communication                 | -4.26 | -2.28 | -5.63 | -2.92 | <b>&lt;0.001*</b> | 0.37 | 0.314 | 0.03 | 0.270 | 0.04 |
| Restrictive and repetitive behaviors | 0.93  | -1.83 | -0.66 | 1.87  | 0.656             | 0.01 | 0.723 | 0.01 | 0.361 | 0.02 |
| Total                                | -3.58 | -4.13 | -6.29 | -1.03 | <b>&lt;0.001*</b> | 0.28 | 0.378 | 0.03 | 0.365 | 0.03 |

---
